# Supplementary material for: Regulation of Microglia and Macrophage Polarization via Apoptosis Signal-Regulating Kinase 1 Silencing after Ischemic/Hypoxic Injury
Source: PubMed Central journal article supplement (PMC5557792; doi:10.3389/fnmol.2017.00261), 2017-08-14
Supplement: Data_Sheet_1.pdf [file Data_Sheet_1.pdf]

[Supplementary data]

**A**

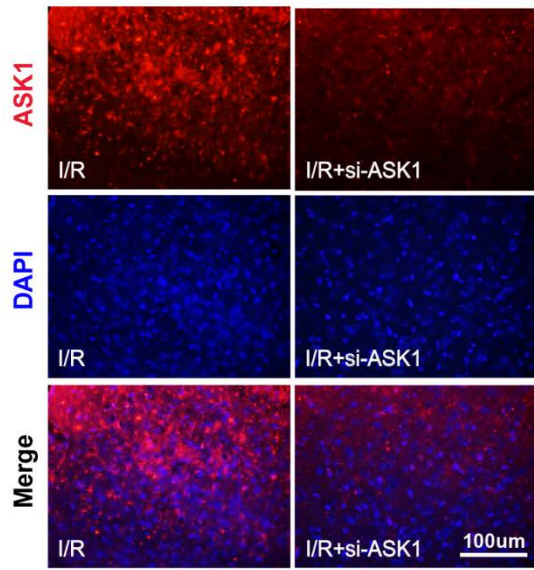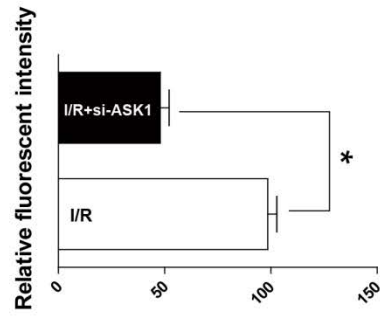

**B**

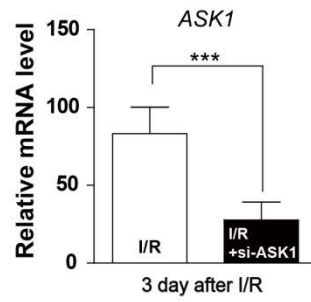

**C**

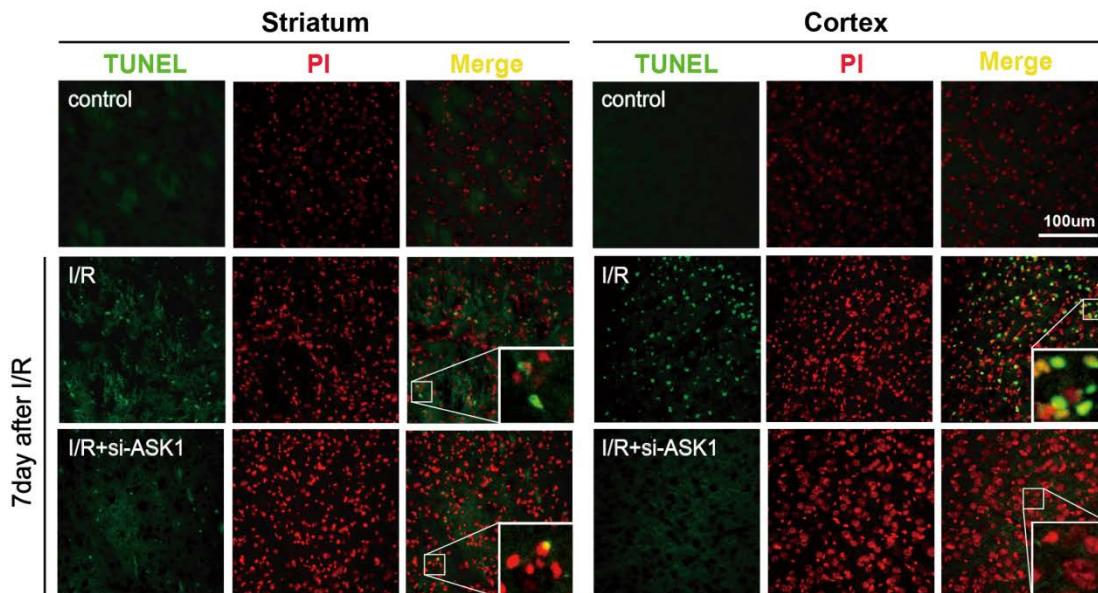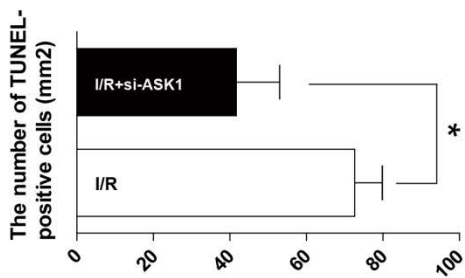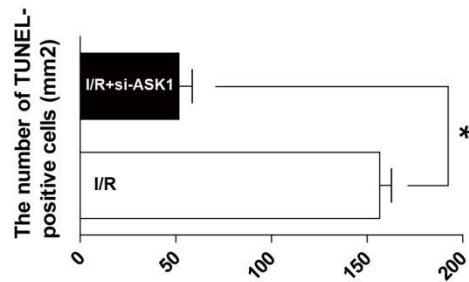

Supplementary Figure 1. (A) ASK1 expressions (red) were efficiently decreased in ipsilateral hemisphere after ASK1 silencing at 7 days after I/R, compared with the I/R group (n = 4). (B) ASK mRNA levels were significantly reduced in ipsilateral hemisphere after ASK1 silencing by genetic manipulation at 3 days after I/R, compared with the I/R group (n = 7). (C) DNA fragmentation in the striatum and cortex was detected by TUNEL assay. The graphs show that TUNEL-positive cells were decreased in the striatum and cortex after ASK1 silencing, compared with the I/R group (n = 4). Values are means  $\pm$  SD. Statistical comparisons between the groups were assessed with non-parametric Mann-whitney test (\* $p$  < 0.05, \*\* $p$  < 0.01, \*\*\* $p$  < 0.001 vs I/R group). Statistical parameter (Supplementary Table 3). I/R, ischemia/reperfusion.

Table 1. Statistical parameter in Figure 1, 2, and 3.

| <b>Immunohistochemistry</b> |         |        |             | <b>ELISA (ipsilateral hemisphere)</b> |         |        |             |
|-----------------------------|---------|--------|-------------|---------------------------------------|---------|--------|-------------|
| <b>Iba-1 (striatum)</b>     | control | I/R    | I/R+si-ASK1 | <b>IL-6</b>                           | control | I/R    | I/R+si-ASK1 |
| Mean                        | 2.524   | 14.51  | 3.469       | Mean                                  | 13.36   | 84.07  | 20.31       |
| Std. Deviation              | 0.5919  | 3.894  | 1.339       | Std. Deviation                        | 4.373   | 43.79  | 8.612       |
| <b>Iba-1 (cortex)</b>       | control | I/R    | I/R+si-ASK1 | <b>TNF-<math>\alpha</math></b>        | control | I/R    | I/R+si-ASK1 |
| Mean                        | 1.929   | 12.5   | 2.731       | Mean                                  | 0.7096  | 3.79   | 1.61        |
| Std. Deviation              | 1.601   | 3.104  | 0.5195      | Std. Deviation                        | 0.3641  | 0.5672 | 0.9012      |
| <b>CD11b (striatum)</b>     | control | I/R    | I/R+si-ASK1 | <b>IL-1<math>\beta</math></b>         | control | I/R    | I/R+si-ASK1 |
| Mean                        | 0.8098  | 8.661  | 1.236       | Mean                                  | 8.146   | 20.29  | 12.99       |
| Std. Deviation              | 0.2241  | 1.513  | 0.4365      | Std. Deviation                        | 1.818   | 0.79   | 1.002       |
| <b>CD11b (cortex)</b>       | control | I/R    | I/R+si-ASK1 | <b>Immunohistochemistry</b>           |         |        |             |
| Mean                        | 0.778   | 8.983  | 1.428       | <b>CD206 (striatum)</b>               | control | I/R    | I/R+si-ASK1 |
| Std. Deviation              | 0.5088  | 2.179  | 0.4768      | Mean                                  | 9.377   | 9.176  | 17.31       |
| <b>Iba-1 (CA1)</b>          | control | I/R    | I/R+si-ASK1 | Std. Deviation                        | 1.483   | 1.845  | 4.47        |
| Mean                        | 3.063   | 13.34  | 4.783       | <b>CD206 (cortex)</b>                 | control | I/R    | I/R+si-ASK1 |
| Std. Deviation              | 0.3315  | 1.631  | 2.36        | Mean                                  | 13.13   | 12.6   | 21.43       |
| <b>Iba-1 (CA3)</b>          | control | I/R    | I/R+si-ASK1 | Std. Deviation                        | 2.414   | 3.363  | 4.755       |
| Mean                        | 2.778   | 21.97  | 6.179       |                                       |         |        |             |
| Std. Deviation              | 0.9622  | 6.926  | 1.311       |                                       |         |        |             |
| <b>CD11b (CA1)</b>          | control | I/R    | I/R+si-ASK1 |                                       |         |        |             |
| Mean                        | 2.295   | 8.614  | 3.025       |                                       |         |        |             |
| Std. Deviation              | 1.138   | 0.7854 | 2.574       |                                       |         |        |             |
| <b>CD11b (CA3)</b>          | control | I/R    | I/R+si-ASK1 |                                       |         |        |             |
| Mean                        | 1.63    | 9.314  | 1.713       |                                       |         |        |             |
| Std. Deviation              | 0.5218  | 2.318  | 0.6213      |                                       |         |        |             |

Table 2. Statistical parameter in Figure 4 and 5.

**ELISA (BV2 cell line)**

| IL-6           | control | I/R    | I/R+si-ASK1 |
|----------------|---------|--------|-------------|
| Mean           | 178.3   | 344.2  | 245.4       |
| Std. Deviation | 13.95   | 59.13  | 59.27       |
| TNF- $\alpha$  | control | I/R    | I/R+si-ASK1 |
| Mean           | 1.124   | 5.565  | 2.503       |
| Std. Deviation | 0.3419  | 0.4499 | 0.3077      |
| IL-1 $\beta$   | control | I/R    | I/R+si-ASK1 |
| Mean           | 6.372   | 22.01  | 15.29       |
| Std. Deviation | 6.739   | 1.426  | 1.912       |
| IL-10          | control | I/R    | I/R+si-ASK1 |
| Mean           | 61.93   | 65.56  | 70.07       |
| Std. Deviation | 1.583   | 2.076  | 1.871       |

**ELISA (RAW264.7 cell line)**

| IL-6           | control | I/R   | I/R+si-ASK1 |
|----------------|---------|-------|-------------|
| Mean           | 4.884   | 10.97 | 5.591       |
| Std. Deviation | 0.6582  | 2.467 | 1.528       |
| TNF- $\alpha$  | control | I/R   | I/R+si-ASK1 |
| Mean           | 51.63   | 140.6 | 112         |
| Std. Deviation | 4.341   | 2.177 | 7.673       |
| IL-1 $\beta$   | control | I/R   | I/R+si-ASK1 |
| Mean           | 7.777   | 19.4  | 11.62       |
| Std. Deviation | 5.814   | 3.592 | 3.305       |
| IL-10          | control | I/R   | I/R+si-ASK1 |
| Mean           | 57.78   | 67.96 | 78.07       |
| Std. Deviation | 2.226   | 2.426 | 14.65       |

**ELISA (BV2 cell supernatants)**

| IL-6           | control | I/R   | I/R+si-ASK1 |
|----------------|---------|-------|-------------|
| Mean           | 853     | 1959  | 1255        |
| Std. Deviation | 65.69   | 75.97 | 50.76       |
| TNF- $\alpha$  | control | I/R   | I/R+si-ASK1 |
| Mean           | 45.85   | 74.78 | 57          |
| Std. Deviation | 7.755   | 4.661 | 7.019       |
| IL-1 $\beta$   | control | I/R   | I/R+si-ASK1 |
| Mean           | 0.9468  | 12.5  | 5.582       |
| Std. Deviation | 0.8164  | 1.415 | 1.635       |
| IL-10          | control | I/R   | I/R+si-ASK1 |
| Mean           | 241.5   | 172.3 | 214.7       |
| Std. Deviation | 7.022   | 5.66  | 22.93       |

**ELISA (RAW264.7 cell supernatants)**

| IL-6           | control | I/R    | I/R+si-ASK1 |
|----------------|---------|--------|-------------|
| Mean           | 9.065   | 11.64  | 9.434       |
| Std. Deviation | 0.2011  | 0.9641 | 0.5123      |
| TNF- $\alpha$  | control | I/R    | I/R+si-ASK1 |
| Mean           | 4774    | 6651   | 6180        |
| Std. Deviation | 110.9   | 158    | 93.75       |
| IL-1 $\beta$   | control | I/R    | I/R+si-ASK1 |
| Mean           | 30.38   | 76.72  | 19.64       |
| Std. Deviation | 6.633   | 14.3   | 1.736       |
| IL-10          | control | I/R    | I/R+si-ASK1 |
| Mean           | 113.4   | 108.8  | 123.7       |
| Std. Deviation | 5.858   | 5.508  | 7.919       |

Table 3. Statistical parameter in Figure 6, 7, 8 and Supplementary Figure 1.

**Real-time (BV2 cell line)**

|                | control | I/R    | I/R+si-ASK1 |
|----------------|---------|--------|-------------|
| IL-1 $\beta$   |         |        |             |
| Mean           | 0.8649  | 1.24   | 0.9491      |
| Std. Deviation | 0.1597  | 0.1947 | 0.1211      |
| iNOS           |         |        |             |
| Mean           | 1.04    | 3.131  | 2.237       |
| Std. Deviation | 0.2771  | 0.5732 | 0.3029      |
| TNF- $\alpha$  |         |        |             |
| Mean           | 0.8347  | 2.267  | 1.554       |
| Std. Deviation | 0.1677  | 0.2814 | 0.2825      |
| CXCL10         |         |        |             |
| Mean           | 0.7453  | 4.676  | 1.417       |
| Std. Deviation | 0.2891  | 0.7727 | 0.5403      |
| IL-10          |         |        |             |
| Mean           | 1.048   | 0.7553 | 1.817       |
| Std. Deviation | 0.1236  | 0.224  | 0.9471      |
| Ym-1           |         |        |             |
| Mean           | 1.159   | 0.7947 | 1.97        |
| Std. Deviation | 0.317   | 0.2259 | 1.056       |

**Real-time (RAW264.7 cell line)**

|                | control | I/R    | I/R+si-ASK1 |
|----------------|---------|--------|-------------|
| IL-1 $\beta$   |         |        |             |
| Mean           | 1.067   | 2.747  | 1.973       |
| Std. Deviation | 0.2124  | 0.4003 | 0.7327      |
| iNOS           |         |        |             |
| Mean           | 0.7636  | 1.431  | 0.8261      |
| Std. Deviation | 0.2042  | 0.5407 | 0.1908      |
| TNF- $\alpha$  |         |        |             |
| Mean           | 0.7923  | 2.096  | 0.6033      |
| Std. Deviation | 0.1623  | 0.3692 | 1.203       |
| CXCL10         |         |        |             |
| Mean           | 1.01    | 2.315  | 2.153       |
| Std. Deviation | 0.1594  | 0.2321 | 0.2142      |
| IL-10          |         |        |             |
| Mean           | 1.309   | 1.53   | 2.822       |
| Std. Deviation | 0.3549  | 0.535  | 0.6097      |
| Ym-1           |         |        |             |
| Mean           | 0.8619  | 0.7446 | 3.001       |
| Std. Deviation | 0.5326  | 0.3041 | 2.541       |

**Migration rates**

| BV2 cell line      | control | I/R   | I/R+si-ASK1 |
|--------------------|---------|-------|-------------|
| Mean               | 7.743   | 40.87 | 14.04       |
| Std. Deviation     | 2.679   | 2.352 | 2.983       |
| RAW264.7 cell line | control | I/R   | I/R+si-ASK1 |
| Mean               | 8.585   | 37.66 | 21.54       |
| Std. Deviation     | 1.952   | 3.436 | 1.821       |

**TUNEL assay**

| cortex         | I/R   | I/R+si-ASK1 |
|----------------|-------|-------------|
| Mean           | 51.67 | 14.04       |
| Std. Deviation | 6.939 | 2.983       |
| striatum       | I/R   | I/R+si-ASK1 |
| Mean           | 72.65 | 41.67       |
| Std. Deviation | 7.236 | 11.39       |

**Immunohistochemistry**

| ASK1           | I/R   | I/R+si-ASK1 |
|----------------|-------|-------------|
| Mean           | 98.51 | 47.97       |
| Std. Deviation | 4.25  | 4.184       |

**Real-time**

| ASK1           | I/R   | I/R+si-ASK1 |
|----------------|-------|-------------|
| Mean           | 83.24 | 27.68       |
| Std. Deviation | 17.01 | 11.56       |
